# Supplementary material
Source: Royal Society of Chemistry journal article supplement (doi:10.1039/d6fd00063k)
Supplement: d6fd00063k1.pdf [file d6fd00063k1.pdf]

# Supplementary Information: Understanding Resonant Inelastic X-ray Scattering Experiments of Diazines via Quantum Dynamics Simulation

Antonia Freibert,<sup>\*a,b</sup> Sebastian Eckert,<sup>c</sup> Vinícius Vaz da Cruz,<sup>c</sup> Alexander Föhlisch<sup>c,d</sup> and Nils Huse<sup>b</sup>

Received 00th January 20xx, Accepted 00th January 20xx DOI: 10.1039/x0xx00000x

## 1 Experimental Data

In the main text, we present only a selected energy region of the nitrogen K-edge X-ray absorption and RIXS spectra of the three diazines, focusing on the range most relevant for the analysis of our results. For completeness, however, Figures S1 and S2 display the spectra over a broader measured energy range.

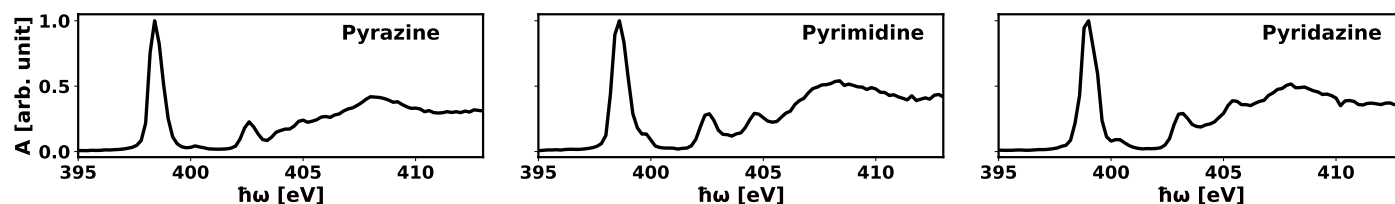

**Figure S1** Experimental X-ray absorption spectra at the nitrogen K-edge of pyrazine, pyrimidine and pyridazine. All three spectra are normalised to the lowest  $\pi^*$  resonance.

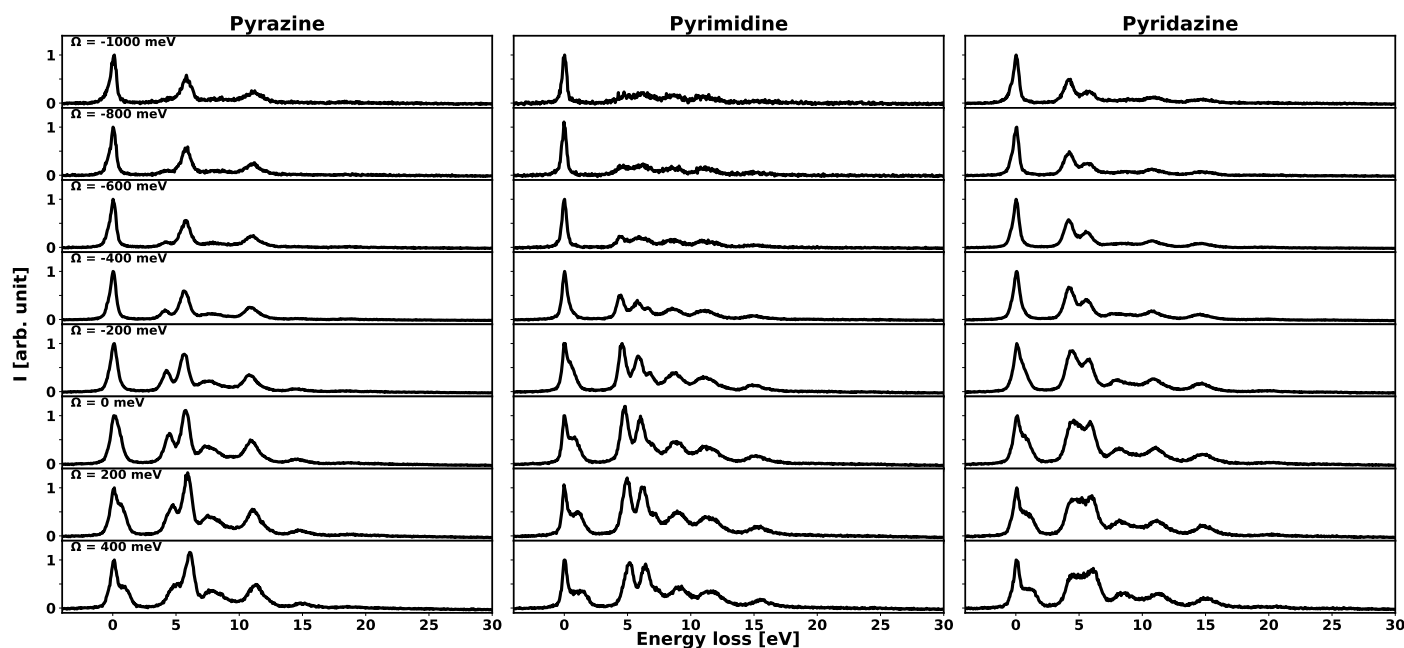

**Figure S2** Experimental detuning dependent RIXS spectra at the nitrogen K-edge  $\pi^*$ -resonance of pyrazine, pyrimidine and pyridazine. All spectra were independently normalised to the elastic peak.

## 2 Electronic Structure Calculations

### 2.1 Harmonic Frequencies

Experimental<sup>1</sup> and *ab initio* vibrational frequencies for the equilibrium ground-state geometries of pyrazine in  $D_{2h}$  symmetry, taken from ref.<sup>2</sup>, and of pyrimidine and pyridazine in  $C_{2v}$  symmetry, computed at the MP2/cc-pVDZ level of theory along with their Wilson notation and irreducible representations are summarised in Table S1. The modes are ordered by increasing vibrational energy with those selected for the 6D model highlighted in red.

**Table S1** Experimental and calculated vibrational frequencies (in  $\text{cm}^{-1}$ ) for the equilibrium ground-state geometries of pyrazine, pyrimidine and pyridazine.

| Mode | Pyrazine |                 |      |      | Pyrimidine |                |      |      | Pyridazine |                |      |      |
|------|----------|-----------------|------|------|------------|----------------|------|------|------------|----------------|------|------|
|      | Wilson   | Sym             | Calc | Exp  | Wilson     | Sym            | Calc | Exp  | Wilson     | Sym            | Calc | Exp  |
| V1   | V16a     | a <sub>u</sub>  | 350  | 341  | V16b       | b <sub>1</sub> | 354  | 344  | V16a       | a <sub>2</sub> | 364  | 410  |
| V2   | V16b     | b <sub>3u</sub> | 425  | 420  | V16a       | a <sub>2</sub> | 406  | 399  | V16b       | b <sub>1</sub> | 370  | 370  |
| V3   | V6a      | a <sub>g</sub>  | 604  | 596  | V6b        | b <sub>2</sub> | 620  | 623  | V6b        | b <sub>2</sub> | 616  | 630  |
| V4   | V6b      | b <sub>3g</sub> | 709  | 704  | V6a        | a <sub>1</sub> | 682  | 677  | V6a        | a <sub>1</sub> | 667  | 665  |
| V5   | V4       | b <sub>2g</sub> | 737  | 756  | V4         | b <sub>1</sub> | 747  | 721  | V4         | a <sub>2</sub> | 737  | 730  |
| V6   | V11      | b <sub>3u</sub> | 805  | 785  | V10b       | b <sub>1</sub> | 815  | 811  | V10a       | b <sub>1</sub> | 761  | 760  |
| V7   | V10a     | b <sub>1g</sub> | 943  | 919  | V5         | b <sub>1</sub> | 973  | 980  | V10b       | a <sub>2</sub> | 939  | 861  |
| V8   | V5       | b <sub>2g</sub> | 950  | 983  | V17a       | a <sub>2</sub> | 986  | 927  | V17b       | b <sub>1</sub> | 970  | 938  |
| V9   | V17a     | a <sub>u</sub>  | 980  | 960  | V17b       | b <sub>1</sub> | 1008 | 955  | V5         | a <sub>2</sub> | 989  | 989  |
| V10  | V12      | b <sub>1u</sub> | 1033 | 1021 | V12        | a <sub>1</sub> | 1009 | 1065 | V1         | a <sub>1</sub> | 997  | 970  |
| V11  | V1       | a <sub>g</sub>  | 1038 | 1015 | V1         | a <sub>1</sub> | 1077 | 991  | V12        | b <sub>2</sub> | 1058 | 1032 |
| V12  | V18b     | b <sub>2u</sub> | 1091 | 1063 | V18b       | b <sub>2</sub> | 1091 | 1071 | V18a       | b <sub>2</sub> | 1081 | 1129 |
| V13  | V14      | b <sub>2u</sub> | 1146 | 1149 | V9a        | a <sub>1</sub> | 1156 | 1147 | V15        | a <sub>1</sub> | 1094 | 1062 |
| V14  | V18a     | b <sub>1u</sub> | 1162 | 1136 | V14        | b <sub>2</sub> | 1238 | 1225 | V9a        | a <sub>1</sub> | 1159 | 1150 |
| V15  | V9a      | a <sub>g</sub>  | 1253 | 1230 | V15        | b <sub>2</sub> | 1343 | 1159 | V3         | b <sub>2</sub> | 1296 | 1283 |
| V16  | V3       | b <sub>3g</sub> | 1367 | 1346 | V3         | b <sub>2</sub> | 1386 | 1370 | V14        | a <sub>1</sub> | 1310 | 1348 |
| V17  | V19b     | b <sub>2u</sub> | 1441 | 1416 | V19a       | a <sub>1</sub> | 1430 | 1398 | V19a       | b <sub>2</sub> | 1421 | 1450 |
| V18  | V19a     | b <sub>1u</sub> | 1518 | 1484 | V19b       | b <sub>2</sub> | 1490 | 1466 | V19b       | a <sub>1</sub> | 1479 | 1410 |
| V19  | V8b      | b <sub>3g</sub> | 1595 | 1525 | V8a        | a <sub>1</sub> | 1619 | 1570 | V8a        | a <sub>1</sub> | 1612 | 1564 |
| V20  | V8a      | a <sub>g</sub>  | 1650 | 1582 | V8b        | b <sub>2</sub> | 1629 | 1568 | V8b        | b <sub>2</sub> | 1613 | 1566 |
| V21  | V7b      | b <sub>3u</sub> | 3196 | 3040 | V20a       | a <sub>1</sub> | 3209 | 3038 | V7b        | b <sub>2</sub> | 3223 | 3056 |
| V22  | V13      | b <sub>1u</sub> | 3197 | 3012 | V7b        | b <sub>2</sub> | 3213 | 3086 | V2         | a <sub>1</sub> | 3228 | 3052 |
| V23  | V20b     | b <sub>2u</sub> | 3213 | 3063 | V13        | a <sub>1</sub> | 3224 | 3052 | V13        | b <sub>2</sub> | 3241 | 3085 |
| V24  | V2       | a <sub>g</sub>  | 3218 | 3055 | V2         | a <sub>1</sub> | 3256 | 3074 | V20b       | a <sub>1</sub> | 3255 | 3064 |

## 2.2 Energies and Transition Dipole Moments

Vertical excitation energies transition dipole moments are reported in Tables S3 and S2, respectively. Valence-excited state energies were computed using EOM-CCSD, whereas core-excited state energies were obtained using fc-CVS-EOM-CCSD. In both cases, the aug-cc-pVDZ basis set was employed. The transition dipole moments and oscillator strengths for each pair of valence- and core-excited states were also computed at the Franck-Condon point using the same level of theory. We neglect transitions where the transition dipole moment was below 0.01.

**Table S2** Averaged transition dipole moments  $\mu_{fi}$  (in a.u.) between two electronic states  $i$  and  $f$ , vertical energy differences  $\Delta E$  (in eV) at the Franck-Condon point and transition character for pyrazine, pyrimidine, and pyridazine obtained from fc-CVS-EOM-CCSD/aug-cc-pVDZ calculations.

| $f \leftarrow i$        | Pyrazine   |            |                                | Pyrimidine |            |                                                             | Pyridazine |            |                                                                 |
|-------------------------|------------|------------|--------------------------------|------------|------------|-------------------------------------------------------------|------------|------------|-----------------------------------------------------------------|
|                         | $\mu_{fi}$ | $\Delta E$ | Character                      | $\mu_{fi}$ | $\Delta E$ | Character                                                   | $\mu_{fi}$ | $\Delta E$ | Character                                                       |
| $X_2 \leftarrow S_0$    | 0.10       | 402.30     | $\sigma_{1s}^* \pi_1^*$ (89 %) | 0.10       | 402.57     | $\sigma_{1s}^* \pi_2^*$ (71 %) + $\sigma_{1s}^* x$ (29 %)   | 0.10       | 402.70     | $\sigma_{1s}^* \pi_2^*$ (84 %) + $\sigma_{1s}^* \pi_1^*$ (16 %) |
| $X_1 \leftarrow S_1$    | 0.06       | 397.98     | $\sigma_{1s}^* n_2$ (99 %)     | 0.05       | 397.93     | $\sigma_{1s}^* n_2$ (99 %)                                  |            |            |                                                                 |
| $X_2 \leftarrow S_1$    |            |            |                                | 0.02       | 397.93     | $\sigma_{1s}^* n_2$ (99 %)                                  | 0.05       | 398.66     | $\sigma_{1s}^* n_1$ (99 %)                                      |
| $X_2 \leftarrow S_2$    |            |            |                                | 0.03       | 397.53     | $\sigma_{1s}^* n_2$ (99 %)                                  |            |            |                                                                 |
| $X_1 \leftarrow S_2$    |            |            |                                |            |            |                                                             | 0.03       | 398.05     | $\sigma_{1s}^* n_1$ (96 %)                                      |
| $X_2 \leftarrow S_3$    |            |            |                                |            |            |                                                             | 0.01       | 397.42     | $\sigma_{1s}^* \pi_2$ (92 %)                                    |
| $X_1 \leftarrow S_4$    |            |            |                                | 0.04       | 396.39     | $\sigma_{1s}^* n_1$ (98 %)                                  | 0.03       | 396.75     | $\sigma_{1s}^* n_2$ (99 %)                                      |
| $X_2 \leftarrow S_4$    | 0.06       | 396.30     | $\sigma_{1s}^* n_1$ (98 %)     | 0.03       | 396.40     | $\sigma_{1s}^* n_1$ (98 %)                                  | 0.04       | 396.75     | $\sigma_{1s}^* n_2$ (99 %)                                      |
| $X_2 \leftarrow S_5$    |            |            |                                | 0.02       | 396.08     | $\sigma_{1s}^* n_1$ (99 %)                                  |            |            |                                                                 |
| $X_1 \leftarrow S_6$    | 0.02       | 395.40     | $\sigma_{1s}^* \pi_2$ (99 %)   |            |            |                                                             | 0.02       | 396.11     | $\sigma_{1s}^* n_2$ (99 %)                                      |
| $X_2 \leftarrow S_6$    |            |            |                                |            |            |                                                             | 0.01       | 396.11     | $\sigma_{1s}^* n_2$ (99 %)                                      |
| $X_2 \leftarrow S_7$    |            |            |                                | 0.03       | 395.66     | $\sigma_{1s}^* \pi_3$ (57 %) + $\sigma_{1s}^* \pi_2$ (43 %) | 0.03       | 395.87     | $\sigma_{1s}^* \pi_3$ (86 %)                                    |
| $X_1 \leftarrow S_{16}$ | 0.04       | 394.16     | $\sigma_{1s}^* \pi_2$ (98 %)   |            |            |                                                             |            |            |                                                                 |
| $X_1 \leftarrow S_{18}$ | 0.04       | 393.95     | $\sigma_{1s}^*$ (99 %)         |            |            |                                                             |            |            |                                                                 |

**Table S3** State symmetries and vertical excitation energies  $E^{(\alpha)}$  (in eV) at the Franck–Condon point for pyrazine, pyrimidine, and pyridazine.

| State    | Pyrazine |                | Pyrimidine |                | Pyridazine |                |
|----------|----------|----------------|------------|----------------|------------|----------------|
|          | Sym      | $E^{(\alpha)}$ | Sym        | $E^{(\alpha)}$ | Sym        | $E^{(\alpha)}$ |
| $S_0$    | $A_g$    | 0.00           | $A_1$      | 0.00           | $A_1$      | 0.00           |
| $S_1$    | $B_{3u}$ | 4.32           | $B_1$      | 4.64           | $B_1$      | 4.04           |
| $S_2$    | $B_{2u}$ | 5.07           | $A_2$      | 5.04           | $A_2$      | 4.65           |
| $S_3$    | $A_u$    | 5.13           | $B_2$      | 5.42           | $A_1$      | 5.28           |
| $S_4$    | $B_{2g}$ | 6.01           | $A_2$      | 6.18           | $A_2$      | 5.95           |
| $S_5$    | $A_g$    | 6.68           | $B_1$      | 6.49           | $B_2$      | 6.34           |
| $S_6$    | $B_{1u}$ | 6.91           | $B_2$      | 6.77           | $B_1$      | 6.60           |
| $S_7$    | $B_{1g}$ | 7.02           | $A_1$      | 6.91           | $B_2$      | 6.82           |
| $S_8$    | $B_{1g}$ | 7.11           | $B_1$      | 7.36           | $A_1$      | 6.96           |
| $S_9$    | $B_{2u}$ | 7.28           | $A_1$      | 7.45           | $B_2$      | 7.23           |
| $S_{10}$ | $B_{1u}$ | 7.47           | $B_2$      | 7.48           | $A_2$      | 7.49           |
| $S_{11}$ | $B_{3u}$ | 7.66           | $A_1$      | 7.71           | $B_1$      | 7.52           |
| $S_{12}$ | $B_{2u}$ | 7.94           | $A_2$      | 7.92           | $A_1$      | 7.69           |
| $S_{13}$ | $B_{3g}$ | 8.00           | $B_2$      | 8.01           | $A_2$      | 7.73           |
| $S_{14}$ | $A_g$    | 8.04           | $B_2$      | 8.11           | $B_2$      | 7.80           |
| $S_{15}$ | $A_u$    | 8.12           | $A_2$      | 8.19           | $B_1$      | 7.80           |
| $S_{16}$ | $B_{1u}$ | 8.14           | $B_1$      | 8.19           | $A_1$      | 7.93           |
| $S_{17}$ | $B_{1g}$ | 8.35           | $A_1$      | 8.22           | $B_2$      | 8.14           |
| $S_{18}$ | $A_u$    | 8.36           | $B_2$      | 8.24           | $B_1$      | 8.29           |
| $S_{19}$ | $B_{2g}$ | 8.53           | $A_2$      | 8.31           | $A_1$      | 8.35           |
| $X_1$    | $B_{2g}$ | 402.30         | $A_2$      | 402.56         | $A_2$      | 402.70         |
| $X_2$    | $B_{3u}$ | 402.30         | $B_1$      | 402.57         | $B_1$      | 402.70         |

### 3 Nuclear Dynamics Simulations

#### 3.1 Linear Vibronic Coupling Model

To perform nuclear quantum dynamics simulations using the MCTDH method, precomputed model Hamiltonians are required for each isomer that accurately describe nuclear motion on both valence- and core-excited states. To simplify the full molecular Hamiltonians, we neglect non-adiabatic couplings between valence- and core-excited states, which is justified by their large energetic separation. This leads to two effectively isolated subspaces

$$\mathbf{H}_{\text{mol}} = \begin{pmatrix} \mathbf{H}_v & 0 \\ 0 & \mathbf{H}_c \end{pmatrix}, \quad (\text{S1})$$

where  $\mathbf{H}_v$  and  $\mathbf{H}_c$  denote the sub-Hamiltonians representing the valence- and core-excited state manifolds, respectively.

In this work, both sub-Hamiltonians are represented in a diabatic electronic basis to avoid singularities in the non-adiabatic coupling terms.<sup>3,4</sup> Each sub-Hamiltonian is then written as

$$\mathbf{H}_x = \hat{T}_N \mathbf{1} + \mathbf{W}_x, \quad x \in \{v, c\}, \quad (\text{S2})$$

with the corresponding diabatic potential matrix  $\mathbf{W}_x$ . To approximate the diabatic Hamiltonians, we employ the vibronic coupling model,<sup>3,5,6</sup> in which  $\mathbf{W}_x$  is expanded in a Taylor series around a reference geometry, typically chosen as the equilibrium geometry of the electronic ground state in spectroscopic applications. It is often convenient to express this expansion in terms of dimensionless mass- and frequency-scaled ground-state normal coordinates<sup>3</sup>, collected in the vector  $\mathbf{Q}$ :

$$\mathbf{H}_x(\mathbf{Q}) = \mathbf{H}^{(0)}(\mathbf{Q}) + \mathbf{W}_x(\mathbf{Q}) \quad (\text{S3})$$

$$= \mathbf{H}^{(0)}(\mathbf{Q}) + \mathbf{W}_x^{(0)}(\mathbf{Q}) + \mathbf{W}_x^{(1)}(\mathbf{Q}) + \mathbf{W}_x^{(2)}(\mathbf{Q}) + \dots, \quad (\text{S4})$$

for both subspaces in Eq. (S1). Here, the zeroth-order Hamiltonian

$$\mathbf{H}^{(0)}(\mathbf{Q}) = \sum_i \frac{\omega_i}{2} \left( -\frac{\partial^2}{\partial Q_i^2} + Q_i^2 \right) \mathbf{1} \quad (\text{S5})$$

corresponds to the harmonic vibrational Hamiltonian of the electronic ground state, where  $\omega_i$  is the harmonic vibrational frequency associated with mode  $Q_i$ .

The Taylor expansion of  $\mathbf{W}_x$  accounts for deviations of the excited-state potentials from the ground-state reference and, up to second order, is given by

$$W_{\alpha\alpha}(\mathbf{Q}) = V^{(\alpha)} + \sum_i \kappa_i^{(\alpha)} Q_i + \sum_{i,j} \gamma_{ij}^{(\alpha)} Q_i Q_j, \quad (\text{S6})$$

$$W_{\alpha\beta}(\mathbf{Q}) = \sum_i \lambda_i^{(\alpha\beta)} Q_i + \sum_{i,j} v_{ij}^{(\alpha\beta)} Q_i Q_j, \quad \alpha \neq \beta, \quad (\text{S7})$$

where  $V^{(\alpha)} \equiv V_\alpha$  denotes the vertical adiabatic excitation energy of the  $\alpha$ -th electronic state, and

$$\kappa_i^{(\alpha)} = \left. \frac{\partial V^{(\alpha)}}{\partial Q_i} \right|_{\mathbf{Q}=\mathbf{Q}_0} \quad (\text{S8})$$

are the linear intrastate coupling constants, corresponding to the gradients of the adiabatic potentials at the Franck-Condon point  $\mathbf{Q}_0$ . The linear interstate coupling constants

$$\lambda_i^{(\alpha\beta)} = \left. \frac{\partial \langle \Psi_\alpha | \hat{H}_{el} | \Psi_\beta \rangle}{\partial Q_i} \right|_{\mathbf{Q}=\mathbf{Q}_0} \quad (\text{S9})$$

describe the coupling between the  $\alpha$ -th and  $\beta$ -th electronic states induced by displacements along mode  $Q_i$ , while the bilinear intrastate coupling constants  $\gamma_{ij}^{(\alpha)}$  account for mode coupling, including Duschinsky rotation effects. In contrast, the bilinear interstate coupling constants  $v_{ij}^{(\alpha\beta)}$  and higher-order terms are found to be of minor importance here and are therefore neglected. Truncation of Eq. (S4) at first order corresponds to the linear vibronic coupling model.

For symmetric molecules such as the three diazines, group theory can be used to reduce the number of non-vanishing coupling parameters. The conditions of the three most significant coupling parameters to be non-vanishing can be summarised to

$$\left\{ \kappa_i^{(\alpha)} \mid \Gamma_i \supseteq \Gamma_{A_g} \right\} \quad (\text{S10})$$

$$\left\{ \gamma_{ij}^{(\alpha)} \mid \Gamma_i \otimes \Gamma_j \supseteq \Gamma_{A_g} \right\} \quad (\text{S11})$$

$$\left\{ \lambda_i^{(\alpha\beta)} \mid \Gamma_\alpha \otimes \Gamma_i \otimes \Gamma_\beta \supseteq \Gamma_{A_g} \right\} \quad (\text{S12})$$

where  $\Gamma_{A_g}$  is the totally symmetric irreducible representation of the symmetry point group of the molecule at the expansion point (here  $D_{2h}$  for pyrazine and  $C_{2v}$  for pyrimidine and pyridazine),  $\Gamma_i$  and  $\Gamma_j$  refer to the symmetry of the normal modes  $Q_i$  and  $Q_j$ , respectively, and  $\Gamma_\alpha$  and  $\Gamma_\beta$  to the corresponding electronic state symmetries.

In this work, linear vibronic coupling Hamiltonians were constructed for pyrimidine and pyridazine and augmented by diagonal quadratic terms for non-totally symmetric modes in the most relevant electronic states. For pyrazine, the vibronic coupling Hamiltonian was adopted from ref. <sup>7</sup>. For selected vibrational modes, pronounced anharmonicity renders the harmonic approximation insufficient. In these cases, the corresponding diabatic potentials were replaced by state-specific quartic  $W_q^{(\alpha\alpha)}$  or Morse  $W_m^{(\alpha\alpha)}$  potentials given by

$$W_m^{(\alpha\alpha)}(\mathbf{Q}) = D_0^{(\alpha)} \left\{ 1 - \exp\left(-a_i^{(\alpha)}(Q_i - Q_0)\right) \right\}^2 + E^{(\alpha)} \quad (\text{S13})$$

$$W_q^{(\alpha\alpha)}(Q_i) = E^{(\alpha)} + \frac{1}{2} \left( \omega_i + \gamma_i^{(\alpha)} + \varepsilon_i^{(\alpha)} Q_i^2 \right) Q_i^2 \quad (\text{S14})$$

where  $D_0^{(\alpha)}$  denotes the state-specific dissociation energy,  $a_i^{(\alpha)}$  defines the curvature of the potential,  $\varepsilon_i^{(\alpha)}$  the quartic expansion and  $Q_0$  is the equilibrium position. The number of included electronic states and the specific parameter values differ between the isomers and are provided in the following subsections.

### 3.2 Hamiltonian Parameters

The specific parameters entering the Hamiltonians for pyrimidine and pyridazine are listed in Tables S4-S9 and Tables S10-S15, respectively, where we used the notation introduced above to denote the relevant parameters. All values are given in eV.

**Table S4** Linear intra- and interstate coupling constants  $\kappa_i^{(n)}$  and  $\lambda_i^{(nm)}$ , respectively, for the core-excited states  $X_n$  of pyrimidine.

|              | $\kappa_4$  | $\kappa_{10}$  | $\kappa_{11}$  | $\kappa_{13}$  | $\kappa_{17}$  | $\kappa_{19}$  |                |                |
|--------------|-------------|----------------|----------------|----------------|----------------|----------------|----------------|----------------|
| $X_1$        | -0.02622    | 0.05408        | -0.10423       | 0.05189        | -0.02000       | -0.14387       |                |                |
| $X_2$        | -0.02603    | 0.05384        | -0.10415       | 0.05199        | -0.01988       | -0.14377       |                |                |
|              | $\lambda_3$ | $\lambda_{12}$ | $\lambda_{14}$ | $\lambda_{15}$ | $\lambda_{16}$ | $\lambda_{18}$ | $\lambda_{20}$ | $\lambda_{22}$ |
| $(X_1, X_2)$ | 0.02746     | 0.01201        | 0.02554        | 0.07340        | 0.01282        | 0.09305        | 0.14338        | 0.00885        |

**Table S5** Linear intrastate coupling constants  $\kappa_i^{(n)}$  for the valence-excited states  $S_n$  of pyrimidine.

|       | $\kappa_4$ | $\kappa_{10}$ | $\kappa_{11}$ | $\kappa_{13}$ | $\kappa_{17}$ | $\kappa_{19}$ |
|-------|------------|---------------|---------------|---------------|---------------|---------------|
| $S_1$ | -0.25880   | 0.14800       | -0.38890      | 0.26810       | -0.11280      | -0.09560      |
| $S_2$ | -0.27860   | 0.13520       | -0.38990      | 0.27830       | 0.12100       | 0.33340       |
| $S_3$ | -0.07080   | -0.07490      | -0.34210      | 0.17940       | -0.03460      | -0.00800      |
| $S_4$ | -0.07340   | 0.16480       | -0.38840      | 0.19420       | -0.22540      | -0.23310      |
| $S_5$ | -0.09800   | 0.15320       | -0.37980      | 0.18280       | 0.01070       | 0.11340       |
| $S_6$ | -0.22720   | 0.20970       | -0.31760      | 0.23620       | 0.01110       | 0.16690       |
| $S_7$ | -0.06980   | 0.00160       | -0.31780      | 0.15600       | 0.01370       | 0.06700       |
| $S_8$ | -0.07690   | 0.06150       | -0.27380      | 0.11640       | -0.00270      | 0.15560       |

**Table S6** Linear interstate coupling constants  $\lambda_i^{(nm)}$  between valence-excited states  $(S_n, S_m)$  of pyrimidine.

|              | $\lambda_1$    | $\lambda_2$    | $\lambda_3$    | $\lambda_4$    | $\lambda_5$    | $\lambda_6$    | $\lambda_7$    | $\lambda_8$    | $\lambda_9$    | $\lambda_{10}$ | $\lambda_{11}$ | $\lambda_{12}$ |
|--------------|----------------|----------------|----------------|----------------|----------------|----------------|----------------|----------------|----------------|----------------|----------------|----------------|
| $(S_1, S_2)$ |                | 0.00380        |                |                |                |                |                |                |                |                |                |                |
| $(S_1, S_3)$ |                |                | 0.02240        |                |                |                |                |                |                |                |                |                |
| $(S_1, S_5)$ |                |                |                |                |                |                |                |                |                |                |                |                |
| $(S_2, S_3)$ | -0.00110       |                |                |                | 0.07290        | -0.02080       | 0.00020        |                |                |                |                |                |
| $(S_2, S_4)$ |                |                |                | -0.06750       |                |                |                |                |                |                |                |                |
| $(S_2, S_5)$ |                |                | 0.00930        |                |                |                |                |                |                |                |                |                |
| $(S_3, S_4)$ | -0.01200       |                |                |                | 0.00270        | 0.00270        | -0.04640       |                |                |                |                |                |
| $(S_3, S_5)$ |                | 0.00720        |                |                |                |                |                |                |                |                |                |                |
| $(S_3, S_6)$ |                |                |                |                |                |                |                |                |                |                |                | 0.00030        |
| $(S_4, S_5)$ | 0.01150        |                |                |                | -0.03840       | 0.00840        | 0.00910        |                |                |                |                |                |
| $(S_4, S_6)$ | 0.00080        |                |                |                |                |                |                |                |                |                |                |                |
| $(S_4, S_7)$ | 0.00340        |                |                |                | 0.08100        | 0.07840        | 0.05360        |                |                |                |                |                |
| $(S_5, S_6)$ |                |                | 0.00190        |                |                |                |                |                |                |                |                |                |
| $(S_5, S_7)$ |                | -0.00450       |                |                |                |                |                |                |                |                |                |                |
| $(S_6, S_7)$ | 0.00040        |                |                |                | -0.02490       | 0.01760        | 0.00270        |                |                |                |                |                |
|              | $\lambda_{13}$ | $\lambda_{14}$ | $\lambda_{15}$ | $\lambda_{16}$ | $\lambda_{17}$ | $\lambda_{18}$ | $\lambda_{19}$ | $\lambda_{20}$ | $\lambda_{21}$ | $\lambda_{22}$ | $\lambda_{23}$ | $\lambda_{24}$ |
| $(S_1, S_2)$ |                |                |                |                |                |                |                |                |                |                |                |                |
| $(S_1, S_3)$ |                |                |                |                |                |                |                | -0.02530       |                |                |                |                |
| $(S_1, S_5)$ | 0.00040        |                |                |                | 0.07690        |                |                |                |                |                |                | -0.00040       |
| $(S_2, S_3)$ |                |                |                |                |                |                |                |                |                |                |                |                |
| $(S_2, S_4)$ |                |                |                |                |                |                |                |                |                | -0.00040       |                |                |
| $(S_2, S_5)$ |                |                |                |                |                |                | -0.30370       |                |                |                |                |                |
| $(S_3, S_4)$ |                |                |                |                |                |                |                |                |                |                |                |                |
| $(S_3, S_5)$ |                |                |                |                |                |                |                |                |                |                |                |                |
| $(S_3, S_6)$ | 0.08310        | 0.00020        |                |                |                |                | 0.02970        | 0.00320        |                |                |                |                |
| $(S_4, S_5)$ |                |                |                |                |                |                |                |                |                |                |                |                |
| $(S_4, S_6)$ |                |                |                |                |                |                |                |                |                |                |                |                |
| $(S_4, S_7)$ |                |                |                |                |                |                |                |                |                |                |                |                |
| $(S_5, S_6)$ | 0.06190        | 0.00020        |                |                |                |                | 0.00820        | 0.01040        |                |                |                |                |
| $(S_5, S_7)$ |                |                |                |                |                |                |                |                |                |                |                |                |
| $(S_6, S_7)$ |                |                |                |                |                |                |                |                |                |                |                |                |

**Table S7** Bilinear intrastate coupling constants  $\gamma_i^{(n)} = \gamma_{ii}^{(n)}$  for the valence-excited states  $S_n$  of pyrimidine.

|       | $\gamma_4$ | $\gamma_{10}$ | $\gamma_{11}$ | $\gamma_{12}$ | $\gamma_{13}$ | $\gamma_{14}$ | $\gamma_{15}$ | $\gamma_{16}$ | $\gamma_{17}$ | $\gamma_{18}$ | $\gamma_{19}$ | $\gamma_{22}$ |
|-------|------------|---------------|---------------|---------------|---------------|---------------|---------------|---------------|---------------|---------------|---------------|---------------|
| $S_1$ | -0.01360   | -0.02100      | -0.02630      | -0.01610      | -0.00360      | -0.02910      | 0.02570       | -0.00960      | -0.05270      | -0.02040      | -0.06510      | 0.01060       |
| $S_2$ | -0.02650   | -0.01920      | -0.02440      | -0.00690      | -0.01650      | -0.04170      | 0.03860       | -0.00300      | -0.08190      | -0.01610      | -0.10590      | 0.01780       |
| $S_3$ | -0.02240   | -0.00830      | -0.01810      | -0.00980      | -0.00980      | -0.02260      | 0.14540       | -0.00050      | -0.02390      | -0.01230      | -0.05980      | 0.01500       |
| $S_4$ | -0.05500   | -0.02300      | -0.02210      | -0.02150      | -0.01640      | -0.02950      | 0.05930       | -0.03000      | -0.05350      | -0.04680      | -0.11350      | 0.01310       |
| $S_5$ | -0.03400   | -0.01880      | -0.02240      | -0.00150      | -0.03070      | -0.03980      | 0.05760       | -0.02480      | -0.06110      | -0.04160      | -0.15560      | 0.02060       |
| $S_6$ | 0.01040    | -0.03340      | -0.02690      | -0.01290      | -0.00560      | -0.04110      | 0.00550       | -0.00760      | -0.06010      | -0.01580      | -0.15040      | 0.01360       |
| $S_7$ | -0.03430   | -0.05720      | -0.01610      | -0.00620      | -0.01590      | -0.03990      | 0.02120       | -0.00360      | -0.09030      | -0.01260      | -0.14010      | 0.01620       |
| $S_8$ | -0.05260   | -0.04800      | -0.03860      | -0.01040      | -0.00800      | -0.03290      | -0.00180      | -0.00180      | -0.05600      | -0.00590      | -0.14040      | 0.01540       |

**Table S8** Morse potential parameters  $[D_0^{(n)}, a_i^{(n)}, Q_0, E^{(n)}]$  for the electronic states  $S_n/X_n$  along mode  $v_i$  of pyrimidine.

| State | $v_{21}$ |        |         |         | $v_{23}$ |         |         |         | $v_{24}$ |        |         |         |
|-------|----------|--------|---------|---------|----------|---------|---------|---------|----------|--------|---------|---------|
|       | $D_0$    | $a$    | $Q_0$   | $E$     | $D_0$    | $a$     | $Q_0$   | $E$     | $D_0$    | $a$    | $Q_0$   | $E$     |
| $S_0$ | 14.5970  | 0.1169 | -0.0126 | -0.0000 | 5.3499   | -0.1943 | 0.0216  | -0.0001 | 6.7524   | 0.1737 | -0.0168 | -0.0001 |
| $S_1$ | 12.3360  | 0.1299 | -0.1494 | -0.0046 | 5.7755   | -0.1962 | 0.1721  | -0.0068 | 6.3542   | 0.1826 | -0.0720 | -0.0011 |
| $S_2$ | 12.3350  | 0.1279 | -0.0550 | -0.0006 | 6.0352   | -0.1966 | 0.2621  | -0.0169 | 6.4585   | 0.1835 | -0.1270 | -0.0034 |
| $S_3$ | 12.3370  | 0.1305 | -0.1613 | -0.0054 | 5.6171   | -0.1962 | 0.1305  | -0.0038 | 6.4300   | 0.1830 | -0.1060 | -0.0024 |
| $S_4$ | 12.3380  | 0.1332 | -0.2723 | -0.0157 | 4.3467   | -0.2102 | -0.0008 | -0.0000 | 6.0249   | 0.1840 | -0.0256 | -0.0001 |
| $S_5$ | 12.3370  | 0.1308 | -0.1770 | -0.0065 | 4.1000   | -0.2179 | 0.0577  | -0.0007 | 5.8813   | 0.1880 | -0.0728 | -0.0011 |
| $S_6$ | 12.3350  | 0.1263 | -0.0298 | -0.0002 | 5.2912   | -0.2052 | 0.1881  | -0.0082 | 4.8711   | 0.2060 | -0.0478 | -0.0005 |
| $S_7$ | 12.3360  | 0.1296 | -0.1142 | -0.0027 | 5.6548   | -0.1967 | 0.1466  | -0.0048 | 4.7128   | 0.2146 | -0.1533 | -0.0049 |
| $S_8$ | 12.3360  | 0.1281 | -0.0965 | -0.0019 | 5.0908   | -0.2056 | 0.1176  | -0.0031 | 5.0735   | 0.1881 | 0.0713  | -0.0009 |
| $X_1$ | 14.9970  | 0.1172 | -0.0977 | -0.0019 | 5.7915   | -0.1921 | 0.1017  | -0.0023 | 6.9378   | 0.1729 | -0.0397 | -0.0003 |
| $X_2$ | 14.9790  | 0.1173 | -0.0982 | -0.0020 | 5.7895   | -0.1916 | 0.0999  | -0.0022 | 6.9377   | 0.1729 | -0.0397 | -0.0003 |

**Table S9** Quartic intrastate potential parameters for the valence-excited states  $S_n$  of pyrimidine. Each entry is given as  $\gamma_i^{(n)}/\varepsilon_i^{(n)}$ .

| State | $v_1$             | $v_2$             | $v_3$             | $v_5$             | $v_6$             |
|-------|-------------------|-------------------|-------------------|-------------------|-------------------|
| $S_1$ | 0.0631 / -0.0390  | -0.0893 / 0.0108  | -0.0977 / 0.0067  | -0.1100 / 0.0082  | -0.0431 / 0.0149  |
| $S_2$ | -0.0363 / 0.0104  | -0.0522 / 0.0157  | -0.0884 / 0.0071  | -0.1210 / 0.0159  | -0.0500 / 0.0137  |
| $S_3$ | -0.0149 / -0.0127 | -0.1185 / 0.0409  | -0.0785 / 0.0053  | -0.1042 / 0.0003  | -0.0936 / 0.0235  |
| $S_4$ | 0.0326 / -0.0445  | -0.0849 / -0.0265 | -0.0550 / 0.0117  | -0.0853 / 0.0105  | -0.0332 / -0.0049 |
| $S_5$ | -0.0075 / -0.0042 | -0.0300 / 0.0011  | -0.0092 / -0.0272 | -0.1061 / 0.0123  | -0.1217 / 0.0719  |
| $S_6$ | -0.0095 / -0.0075 | -0.0198 / -0.0148 | -0.0951 / 0.0387  | -0.1119 / 0.0009  | -0.0245 / 0.0097  |
| $S_7$ | -0.0098 / 0.0041  | -0.0657 / 0.0191  | -0.0549 / 0.0046  | -0.0971 / 0.0094  | 0.0191 / -0.0250  |
| $S_8$ | -0.0154 / -0.0119 | -0.0384 / 0.0036  | -0.0636 / -0.0010 | -0.0977 / 0.0063  | -0.0610 / 0.0106  |
| State | $v_7$             | $v_8$             | $v_9$             | $v_{20}$          |                   |
| $S_1$ | -0.0131 / 0.0197  | -0.1765 / 0.0352  | -0.0815 / 0.0188  | -0.1331 / 0.0510  |                   |
| $S_2$ | -0.0651 / 0.0108  | -0.1115 / 0.0250  | -0.1089 / 0.0148  | -0.1269 / 0.0337  |                   |
| $S_3$ | -0.0528 / 0.0198  | -0.1229 / 0.0283  | -0.0648 / 0.0132  | -0.1499 / 0.0327  |                   |
| $S_4$ | -0.0083 / -0.0480 | -0.1456 / 0.0325  | -0.0780 / 0.0127  | -0.3246 / 0.1077  |                   |
| $S_5$ | -0.1364 / 0.0839  | -0.1093 / 0.0607  | -0.1145 / 0.0182  | -0.1451 / -0.0162 |                   |
| $S_6$ | 0.0081 / 0.0016   | -0.1304 / 0.0305  | -0.0505 / 0.0111  | -0.1900 / 0.0342  |                   |
| $S_7$ | 0.0214 / -0.0361  | -0.1068 / 0.0095  | -0.0760 / 0.0163  | -0.2188 / 0.0112  |                   |
| $S_8$ | -0.0177 / 0.0123  | -0.0682 / -0.0090 | -0.0249 / 0.0049  | -0.1955 / 0.0415  |                   |

**Table S10** Linear intra- and interstate coupling constants  $\kappa_i^{(n)}$  and  $\lambda_i^{(nm)}$ , respectively, for the core-excited states  $X_n$  of pyridazine.

|              | $\kappa_4$  | $\kappa_{10}$  | $\kappa_{13}$  | $\kappa_{14}$  | $\kappa_{16}$  | $\kappa_{18}$  | $\kappa_{19}$  |                |
|--------------|-------------|----------------|----------------|----------------|----------------|----------------|----------------|----------------|
| $X_1$        | -0.02911    | -0.06089       | 0.00039        | -0.05167       | -0.04639       | -0.09846       | -0.10468       |                |
| $X_2$        | -0.02935    | -0.06149       | 0.00060        | -0.05208       | -0.04852       | -0.10013       | -0.10694       |                |
|              | $\lambda_3$ | $\lambda_{11}$ | $\lambda_{12}$ | $\lambda_{15}$ | $\lambda_{17}$ | $\lambda_{20}$ | $\lambda_{21}$ | $\lambda_{23}$ |
| $(X_1, X_2)$ | 0.04701     | 0.11639        | 0.01656        | 0.05388        | 0.03856        | 0.07256        | 0.01791        | -0.00195       |

**Table S11** Linear intrastate coupling constants  $\kappa_i^{(n)}$  for the valence-excited states  $S_n$  of pyridazine.

|       | $\kappa_4$ | $\kappa_{10}$ | $\kappa_{13}$ | $\kappa_{14}$ | $\kappa_{16}$ | $\kappa_{18}$ | $\kappa_{19}$ |
|-------|------------|---------------|---------------|---------------|---------------|---------------|---------------|
| $S_1$ | -0.26630   | 0.12580       | 0.31590       | -0.08540      | 0.40750       | 0.01850       | -0.01070      |
| $S_2$ | -0.28280   | 0.13870       | 0.32150       | 0.08590       | 0.44140       | 0.20520       | 0.36740       |
| $S_3$ | -0.09300   | -0.13020      | 0.23170       | -0.05320      | 0.31440       | -0.02820      | -0.01970      |
| $S_4$ | -0.13760   | -0.14050      | 0.10450       | -0.15700      | -0.06730      | -0.07730      | -0.18880      |
| $S_5$ | -0.26910   | 0.22360       | 0.29540       | -0.01310      | 0.35580       | 0.11690       | 0.10110       |
| $S_6$ | -0.13510   | -0.10920      | 0.15540       | -0.01190      | 0.09900       | 0.07270       | 0.08210       |
| $S_7$ | -0.16540   | 0.02810       | 0.20340       | -0.05650      | 0.20610       | 0.06760       | 0.05490       |
| $S_8$ | -0.25310   | 0.16300       | 0.31160       | -0.02150      | 0.26290       | 0.12880       | 0.11890       |

**Table S12** Linear interstate coupling constants  $\lambda_i^{(nm)}$  between electronic states ( $S_n, S_m$ ) of pyridazine.

|              | $\lambda_1$    | $\lambda_2$    | $\lambda_3$    | $\lambda_4$    | $\lambda_5$    | $\lambda_6$    | $\lambda_7$    | $\lambda_8$    | $\lambda_9$    | $\lambda_{10}$ | $\lambda_{11}$ | $\lambda_{12}$ |
|--------------|----------------|----------------|----------------|----------------|----------------|----------------|----------------|----------------|----------------|----------------|----------------|----------------|
| $(S_3, S_8)$ |                |                |                |                |                |                |                |                |                | 0.01580        |                |                |
| $(S_5, S_6)$ |                |                |                |                | 0.00030        |                | 0.00130        |                | 0.00020        |                |                |                |
| $(S_5, S_7)$ |                |                |                |                |                |                |                |                |                | 0.04840        |                |                |
|              | $\lambda_{13}$ | $\lambda_{14}$ | $\lambda_{15}$ | $\lambda_{16}$ | $\lambda_{17}$ | $\lambda_{18}$ | $\lambda_{19}$ | $\lambda_{20}$ | $\lambda_{21}$ | $\lambda_{22}$ | $\lambda_{23}$ | $\lambda_{24}$ |
| $(S_1, S_6)$ |                |                |                |                |                |                |                |                |                | -0.00760       |                |                |
| $(S_2, S_4)$ | 0.07060        |                |                |                |                |                | 0.00440        |                |                | -0.00120       |                |                |
| $(S_3, S_8)$ |                |                |                |                |                |                |                |                |                | 0.00420        |                |                |
| $(S_5, S_7)$ | -0.02590       | 0.00080        |                | 0.03950        |                |                |                |                |                | -0.00550       |                | 0.00420        |

**Table S13** Bilinear intrastate coupling constants  $\gamma_i^{(n)} = \gamma_{ii}^{(n)}$  for the valence-excited states  $S_n$  of pyridazine.

|       | $\gamma_4$ | $\gamma_6$ | $\gamma_{10}$ | $\gamma_{12}$ | $\gamma_{13}$ | $\gamma_{14}$ | $\gamma_{15}$ | $\gamma_{16}$ | $\gamma_{17}$ | $\gamma_{18}$ | $\gamma_{19}$ | $\gamma_{21}$ | $\gamma_{23}$ |
|-------|------------|------------|---------------|---------------|---------------|---------------|---------------|---------------|---------------|---------------|---------------|---------------|---------------|
| $S_1$ | -0.0046    | 0.0026     |               | 0.0017        | 0.0086        | 0.0030        | -0.0409       | 0.0692        | -0.0435       | -0.0263       | -0.0470       | 0.0087        | 0.0090        |
| $S_2$ | -0.0238    |            | -0.0113       | -0.0091       | -0.0396       | 0.0025        | 0.0187        | 0.0586        | -0.0228       | -0.0079       | -0.0494       | 0.0096        | 0.0095        |
| $S_3$ | -0.0153    | -0.0053    | 0.0092        | -0.0038       | -0.0105       | 0.0190        | -0.0138       | 0.1358        | -0.0217       | 0.0033        | -0.0241       | 0.0089        | 0.0085        |
| $S_4$ | -0.0324    | -0.0027    | 0.0050        | -0.0071       | -0.0631       | -0.0230       | -0.0804       | 0.0039        | -0.0409       | -0.0706       | -0.1052       | 0.0039        | 0.0058        |
| $S_5$ | 0.0134     | 0.0033     | -0.0155       | 0.0014        | 0.0371        | 0.0168        | -0.0152       | 0.0155        | -0.0317       | 0.0055        | -0.1095       | 0.0070        | 0.0056        |
| $S_6$ | -0.0423    | -0.0102    | -0.0058       | -0.0140       | -0.0161       | 0.0046        | -0.0276       | -0.0541       | -0.0231       | -0.0330       | -0.0562       | 0.0016        | 0.0064        |
| $S_7$ | -0.0347    | -0.0018    | -0.0473       | -0.0040       | -0.0281       | -0.0259       | -0.0437       | 0.0090        | -0.0305       | -0.0522       | -0.1063       | 0.0101        | 0.0086        |
| $S_8$ | -0.0030    | 0.0178     | -0.0099       | 0.0017        | -0.0089       | 0.0004        | -0.0193       | 0.0196        | -0.0318       | -0.0016       | -0.0543       | 0.0065        | 0.0013        |

**Table S14** Morse potential parameters  $[D_0^{(n)}, a_i^{(n)}, Q_0, E^{(n)}]$  for the electronic states  $S_n/X_n$  along mode  $v_i$  of pyridazine.

| State | $v_{22}$ |        |         |         | $v_{24}$ |        |         |         |
|-------|----------|--------|---------|---------|----------|--------|---------|---------|
|       | $D_0$    | $a_i$  | $Q_0$   | $E$     | $D_0$    | $a_i$  | $Q_0$   | $E$     |
| $S_0$ | 11.4090  | 0.1348 | -0.0841 | -0.0015 | 9.5056   | 0.1488 | -0.1193 | -0.0029 |
| $S_1$ | 11.4890  | 0.1352 | -0.1162 | -0.0028 | 9.6796   | 0.1490 | -0.1684 | -0.0059 |
| $S_2$ | 11.7580  | 0.1364 | -0.2369 | -0.0119 | 9.7170   | 0.1490 | -0.1762 | -0.0065 |
| $S_3$ | 11.4200  | 0.1350 | -0.1014 | -0.0021 | 9.7768   | 0.1489 | -0.1928 | -0.0078 |
| $S_4$ | 12.6610  | 0.1228 | 0.0921  | -0.0016 | 9.6083   | 0.1484 | -0.1376 | -0.0039 |
| $S_5$ | 13.4670  | 0.1247 | -0.1194 | -0.0029 | 8.6214   | 0.1506 | -0.0569 | -0.0006 |
| $S_6$ | 12.5800  | 0.1246 | 0.0008  | -0.0000 | 9.5369   | 0.1489 | -0.1333 | -0.0037 |
| $S_7$ | 13.2370  | 0.1252 | -0.0971 | -0.0019 | 9.7006   | 0.1488 | -0.1711 | -0.0061 |
| $S_8$ | 12.4130  | 0.1271 | -0.0774 | -0.0012 | 9.4058   | 0.1490 | -0.1080 | -0.0024 |
| $X_1$ | 14.9900  | 0.1168 | -0.0551 | -0.0006 | 13.5700  | 0.1230 | -0.0672 | -0.0009 |
| $X_2$ | 14.9890  | 0.1168 | -0.0544 | -0.0006 | 13.5740  | 0.1230 | -0.0671 | -0.0009 |

**Table S15** Quartic intrastate potential parameters for the valence-excited states  $S_n$  of pyridazine. Each entry is given as  $\gamma_i^{(n)}/\epsilon_i^{(n)}$ .

| State | $v_1$                 | $v_2$                 | $v_3$                 | $v_5$                 | $v_6$                 |
|-------|-----------------------|-----------------------|-----------------------|-----------------------|-----------------------|
|       | $S_1$                 | -0.041957 / 0.008933  | 0.044422 / -0.013973  | -0.036644 / -0.005186 | -0.075303 / -0.031280 |
| $S_2$ | 0.013170 / -0.012887  | -0.068031 / 0.002495  | -0.048297 / 0.002267  | -0.034590 / 0.002062  | -0.052812 / 0.002352  |
| $S_3$ | -0.064249 / 0.031494  | -0.009824 / -0.008051 | -0.056950 / 0.002039  | -0.114590 / 0.006350  | -0.017286 / -0.024075 |
| $S_4$ | -0.072279 / 0.004404  | 0.075303 / -0.031280  | -0.099225 / -0.020461 | -0.052249 / -0.002208 | -0.101410 / 0.007909  |
| $S_5$ | 0.021276 / -0.026163  | 0.045278 / -0.034935  | -0.052812 / 0.002352  | -0.101410 / 0.007909  | -0.017286 / -0.024075 |
| $S_6$ | -0.044642 / 0.017165  | -0.041132 / 0.013523  | 0.002132 / -0.014411  | -0.150060 / 0.012529  | -0.171090 / 0.054311  |
| $S_7$ | -0.065756 / 0.020354  | -0.041747 / 0.002444  | -0.049900 / 0.008451  | -0.059628 / -0.002431 | -0.017092 / 0.002188  |
| $S_8$ | 0.000846 / 0.003907   | 0.025432 / -0.012847  | -0.065146 / 0.018298  | -0.097651 / 0.016878  | -0.034446 / 0.029273  |
| State | $v_7$                 | $v_8$                 | $v_9$                 | $v_{20}$              |                       |
| $S_1$ | -0.041132 / 0.013523  | -0.041747 / 0.002444  | 0.025432 / -0.012847  | -0.228740 / 0.035215  |                       |
| $S_2$ | 0.002132 / -0.014411  | -0.049900 / 0.008451  | -0.065146 / 0.018298  | -0.077061 / 0.022964  |                       |
| $S_3$ | -0.089842 / 0.024135  | -0.046321 / 0.013394  | 0.013841 / 0.013841   | -0.091646 / 0.013660  |                       |
| $S_4$ | -0.054000 / 0.063760  | -0.055517 / 0.021560  | -0.097651 / 0.016878  | -0.198300 / 0.025190  |                       |
| $S_5$ | -0.017286 / -0.024075 | -0.013701 / -0.020416 | -0.043578 / -0.001802 | -0.161910 / 0.029276  |                       |
| $S_6$ | -0.171090 / 0.054311  | -0.095052 / 0.045524  | -0.118620 / 0.042274  | -0.135860 / 0.000303  |                       |
| $S_7$ | -0.017092 / 0.002188  | -0.043066 / 0.013841  | -0.044458 / 0.008670  | -0.135210 / 0.026842  |                       |
| $S_8$ | -0.034446 / 0.029273  | -0.003740 / 0.010018  | -0.034665 / 0.014377  | -0.131810 / 0.042041  |                       |

### 3.3 Potential Energy Curves

Cuts through the core-excited state PESs along the 24 dimensionless vibrational normal modes of pyrazine, pyrimidine, and pyridazine are shown in Figures S3, S4, and S5, respectively. Adiabatic single-point energies are indicated by black dots, whereas the coloured solid lines correspond to the diabatic potential energy surfaces incorporated into the respective Hamiltonians. Modes selected for the reduced dimensional models are highlighted in red.

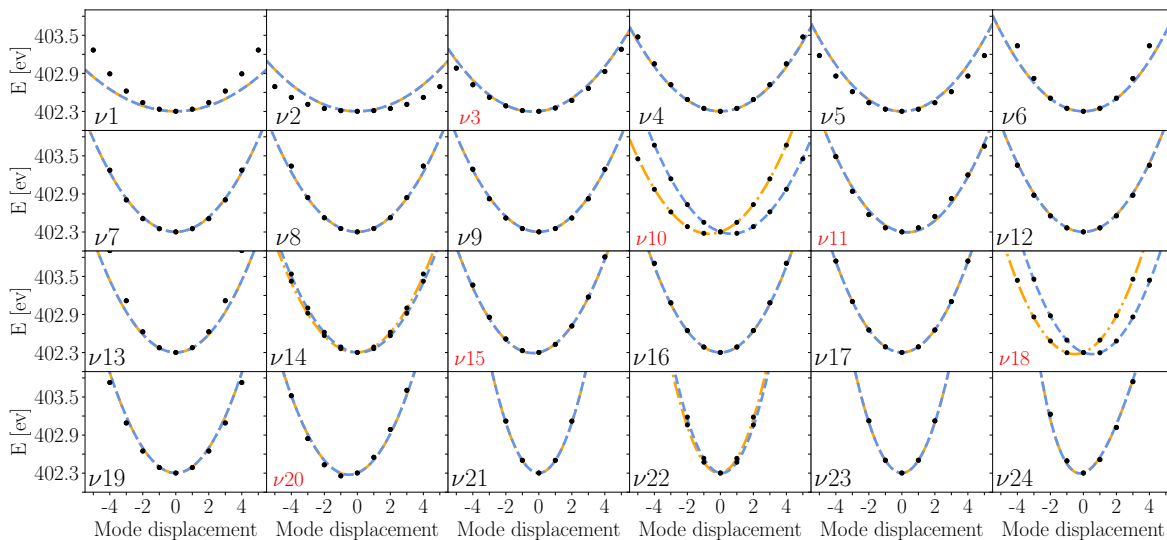

Figure S3 Cuts through core-excited state PESs of pyrazine.

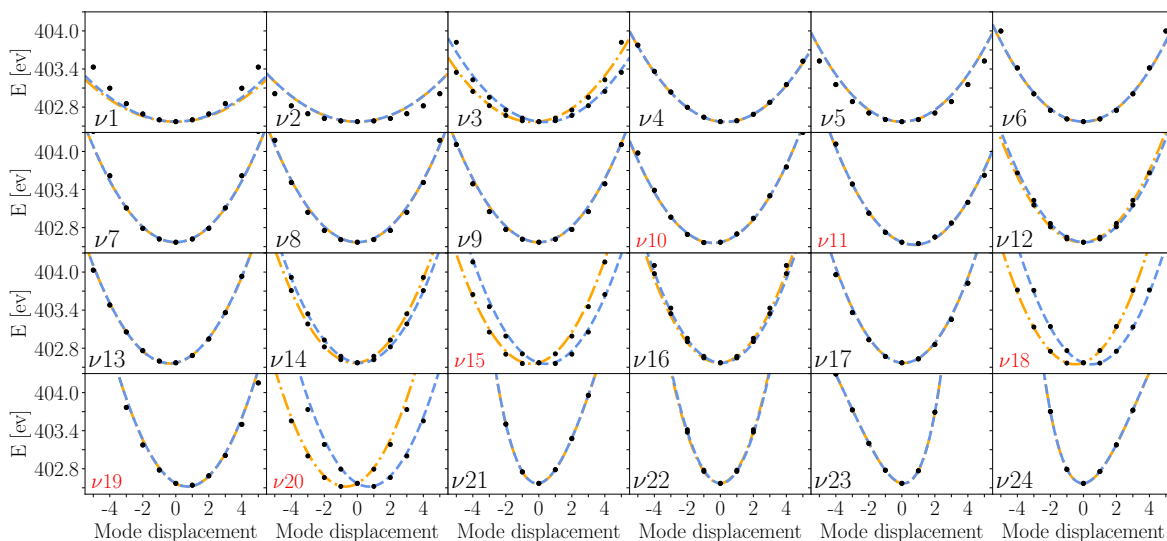

Figure S4 Cuts through core-excited state PESs of pyrimidine.

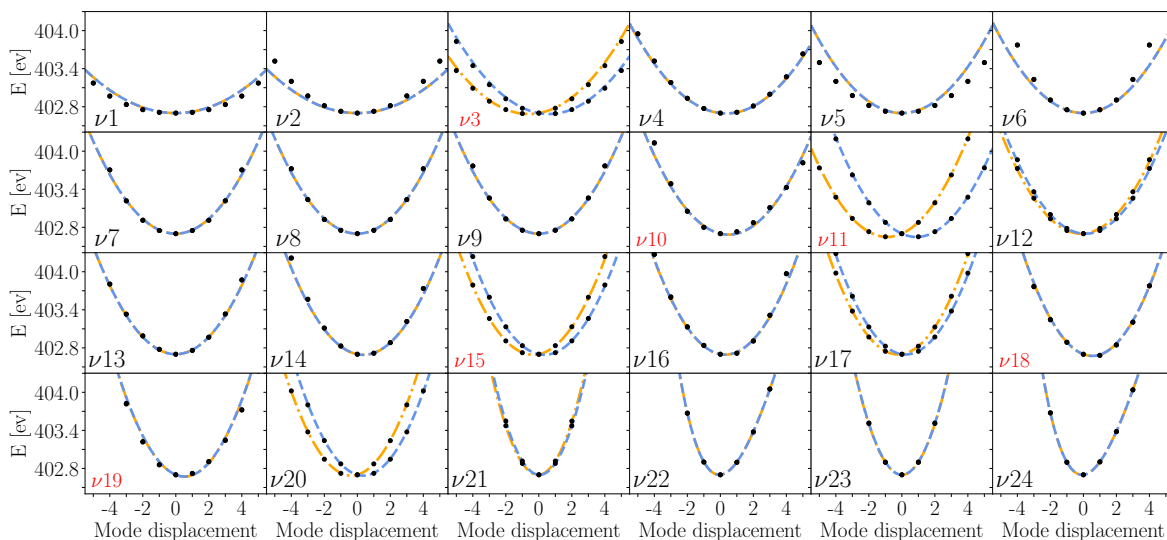

Figure S5 Cuts through core-excited state PESs of pyridazine.

### 3.4 24D vs 6D Model

Because a Lanczos diagonalisation of the full dimensional Hamiltonians would be computationally expensive, we constructed reduced six dimensional models to calculate the stick spectra underlying the elastic peak. Since the dynamical features observed in the elastic peak can be interpreted as a mirror image of the core-excited-state dynamics, we identified the six most prominent vibrational modes driving the nuclear motion within the core-excited state manifold. In each case, this set comprises both totally symmetric normal modes and non-totally symmetric normal modes responsible for symmetry breaking. For pyrazine, only six modes show significant vibronic coupling parameters, whereas for pyrimidine and pyridazine a selection had to be made. In these cases, the modes were chosen based on the magnitude of their coupling strengths. To validate the reduced-dimensionality models, we recalculated both the X-ray absorption and RIXS spectra, shown in Figures S6 and S7, respectively. While pyrazine shows excellent agreement between the reduced and full dimensional models within the broadening chosen to match the experimental conditions, pyrimidine and pyridazine exhibit somewhat larger quantitative differences between the 6D and 24D models. Nevertheless, both reduced and full dimensional treatments reproduce the main spectral features, thereby supporting the suitability of the selected vibrational modes for the reduced model systems.

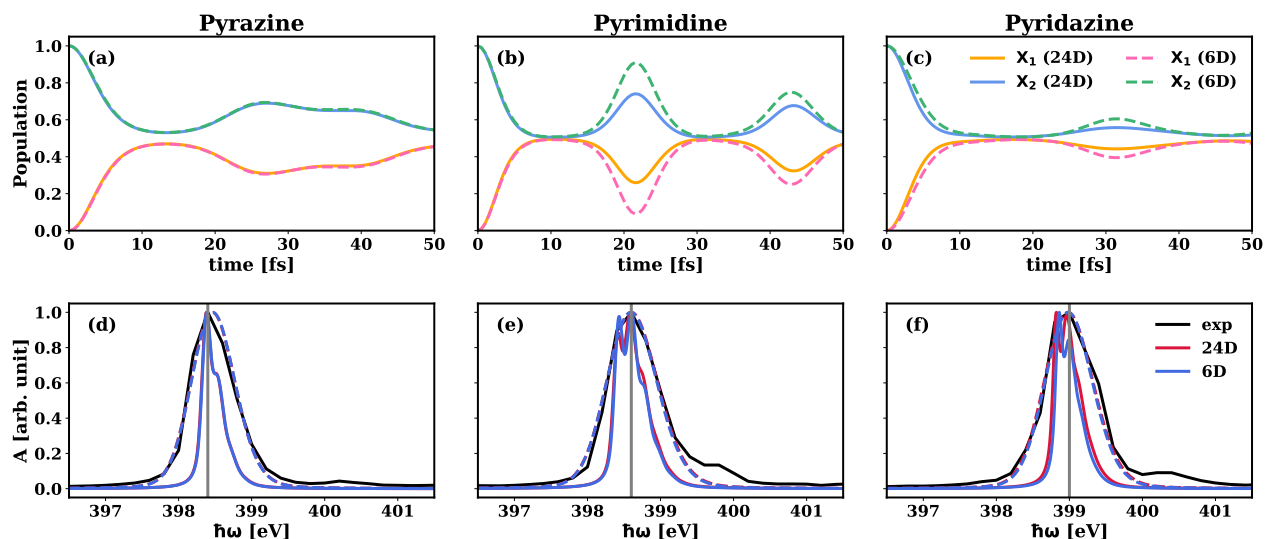

Figure S6 Top row: Normalised population dynamics of the core-excited diabatic states  $X_1$  (24D orange, 6D magenta) and  $X_2$  (24D blue, 6D green), following excitation to  $X_2$  at the Franck–Condon point for (a) pyrazine, (b) pyrimidine, and (c) pyridazine. Bottom row: Experimental (black) and computed (24D red, 6D blue) static nitrogen K-edge X-ray absorption spectra of (d) pyrazine, (e) pyrimidine and (f) pyridazine.

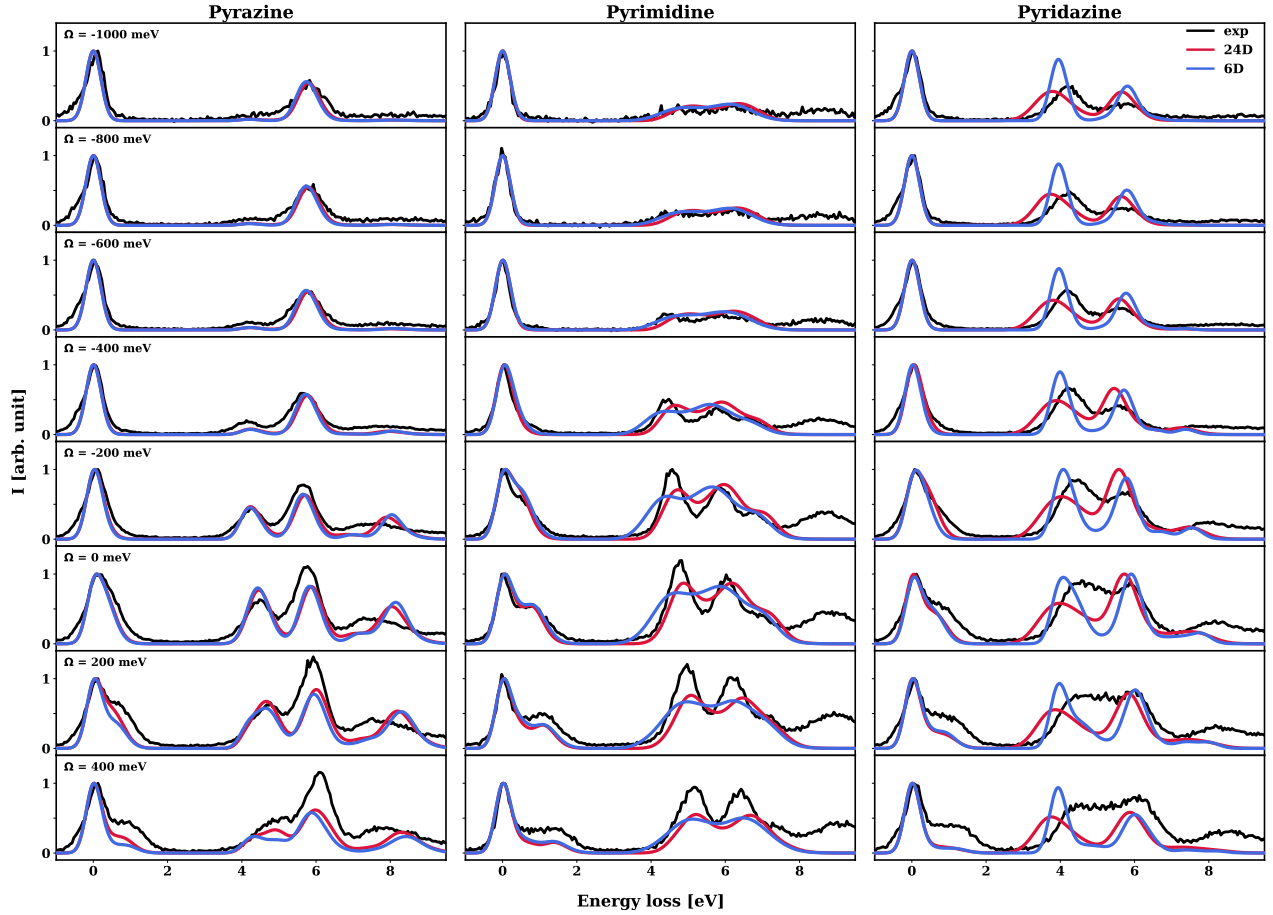

**Figure S7** Experimental (black) and simulated RIXS spectra using the 24D (red) and 6D (blue) model for various excitation energies. The theoretical incoming excitation energies were consistently shifted by 0.1 eV for pyrazine and 0.2 eV for pyrimidine and pyridazine. All spectra are independently normalised to their respective elastic peak height before rescaling the low energy loss region. When performing the Fourier transform a damping time of 80 fs was assumed and an additional Gaussian broadening was applied to match the experimental broadening of the elastic peak for far off resonant excitations.

### 3.5 Orientational Averaging

Since the molecules are randomly oriented in solution, the simulated RIXS cross sections must be averaged over all molecular orientations.<sup>8</sup> Following the notation of ref.<sup>9</sup>, the total RIXS cross section can be expressed as

$$\overline{\sigma(\omega_S, \omega_I, \chi)} = \frac{1}{30} \sum_f \sum_{k,l} \left[ (3 + \cos^2 \chi) \sigma_f^{kkl} + \frac{1}{2} (1 - 3 \cos^2 \chi) (\sigma_f^{klkl} + \sigma_f^{kllk}) \right] \quad (\text{S15})$$

where  $\sigma_f^{klmn} = (\alpha_f^{kn})^\dagger \alpha_f^{lm}$  denotes the polarisability tensor component where

$$\alpha_f^{kl} = \sum_i \frac{\mu_{fi}^k \mu_{i0}^l}{\tilde{\omega}_I - E_i + i\Gamma_c/2} \quad (\text{S16})$$

is defined in terms of the electronic transition dipole moments and  $k, l, m, n \in \{x, y, z\}$ . Notably, the resulting RIXS cross section depends on the angle  $\chi$  between the polarisation vector of the incident photon and the wave vector of the emitted photon. All spectra presented in the main text and the ESI were calculated assuming horizontal polarisation corresponding to  $\chi = 0^\circ$ .

### 3.6 Computational Details

The full 24 dimensional calculations were run using the ML-MCTDH method. The tree structure of these simulations are given in Figure S8, S9 and S10 for pyrazine, pyrimidine and pyridazine, respectively. In each case, the first layer separates the 24 vibrational coordinates and the discrete electronic degree of freedom in the single-set formulation. The circles represent the node in the layer structure, and the number of SPFs is given next to the link lines. The last layer comprises the vibrational normal modes, where the number of primitive functions next to the link lines is used to represent the grid.

The reduced six dimensional calculations were run using the conventional MCTDH method using the multi-set formalism. The combination of modes and numbers of SPFs are given in Tables S16, S17 and S18. In each case, harmonic oscillator-type (HO) discrete variable representations (DVRs) were chosen.

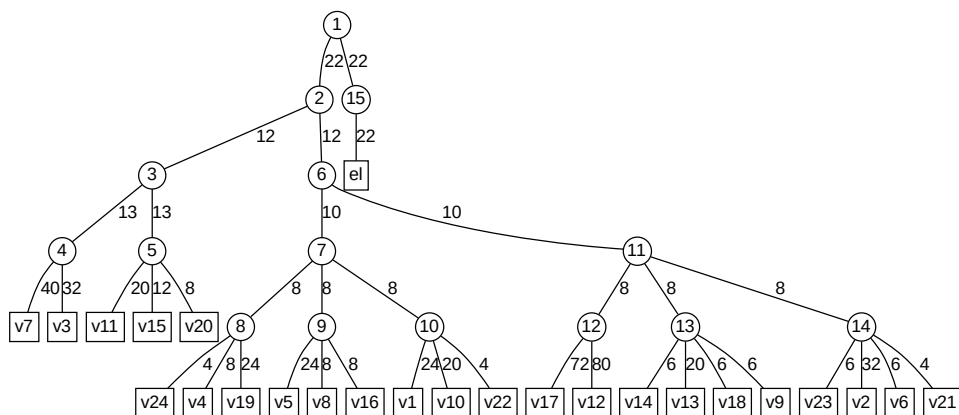

Figure S8 ML-MCTDH tree structure for pyrazine.

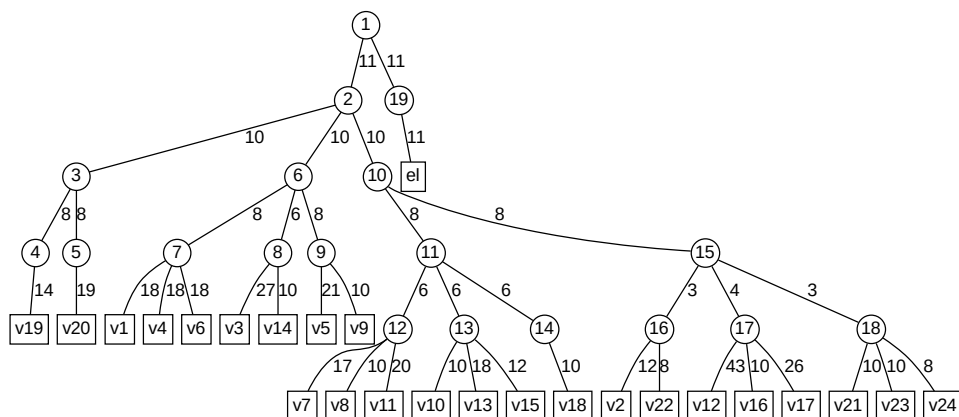

Figure S9 ML-MCTDH tree structure for pyrimidine.

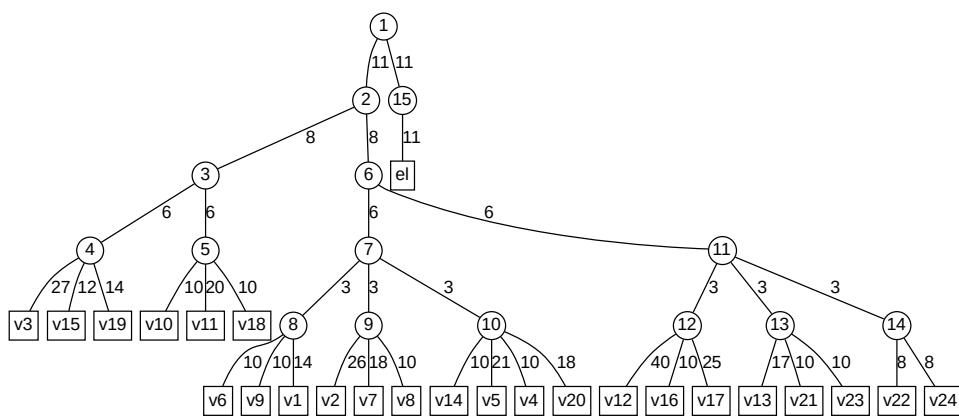

Figure S10 ML-MCTDH tree structure for pyridazine.

**Table S16** Computational details of MCTDH calculations for the six dimensional model of pyrazine. For each electronic state 10 SPFs were chosen.

| Combination of modes   | Numbers of SPFs   |
|------------------------|-------------------|
| $(\nu_3, \nu_{20})$    | [10, 10, ..., 10] |
| $(\nu_{11}, \nu_{15})$ | [10, 10, ..., 10] |
| $(\nu_{10}, \nu_{18})$ | [10, 10, ..., 10] |

**Table S17** Computational details of MCTDH calculations for the six dimensional model of pyrimidine. For the electronic ground and core-excited states 20 SPFs were chosen while 10 SPFs were used for all valence excited states.

| Combination of modes   | Numbers of SPFs           |
|------------------------|---------------------------|
| $(\nu_{10}, \nu_{15})$ | [20, 10, ..., 10, 20, 20] |
| $(\nu_{11}, \nu_{19})$ | [10, 10, ..., 10, 20, 20] |
| $(\nu_{18}, \nu_{20})$ | [10, 10, ..., 10, 20, 20] |

**Table S18** Computational details of MCTDH calculations for the six dimensional model of pyridazine. For the electronic ground and core-excited states 20 SPFs were chosen while 10 SPFs were used for all valence excited states.

| Combination of modes   | Numbers of SPFs           |
|------------------------|---------------------------|
| $(\nu_3, \nu_{19})$    | [20, 10, ..., 10, 20, 20] |
| $(\nu_{15}, \nu_{18})$ | [10, 10, ..., 10, 20, 20] |
| $(\nu_{10}, \nu_{11})$ | [10, 10, ..., 10, 20, 20] |

## Notes and references

- [S1] K. Innes, I. Ross and W. R. Moomaw, *J. Mol. Spectrosc.*, 1988, **132**, 492–544.
- [S2] A. Freibert, D. Mendive-Tapia, N. Huse and O. Vendrell, *Journal of Chemical Theory and Computation*, 2024, **20**, 2167–2180.
- [S3] H. Köuppel, W. Domcke and L. S. Cederbaum, in *Multimode Molecular Dynamics Beyond the Born-Oppenheimer Approximation*, John Wiley & Sons, Ltd, 1984, pp. 59–246.
- [S4] G. A. Worth and L. S. Cederbaum, *Annu. Rev. Phys. Chem.*, 2004, **55**, 127–158.
- [S5] L. Cederbaum, W. Domcke, H. Köppel and W. Von Niessen, *Chem. Phys.*, 1977, **26**, 169–177.
- [S6] W. Domcke and L. Cederbaum, *Chem. Phys.*, 1977, **25**, 189–196.
- [S7] A. Freibert, D. Mendive-Tapia, O. Vendrell and N. Huse, *Phys. Chem. Chem. Phys.*, 2024, **26**, 22572–22581.
- [S8] F. Gel'mukhanov and H. Ågren, *Phys. Rev. A*, 1994, **49**, 4378–4389.
- [S9] V. Vaz da Cruz, R. Büchner, M. Fondell, A. Pietzsch, S. Eckert and A. Föhlisch, *The Journal of Physical Chemistry Letters*, 2022, **13**, 2459–2466.

<sup>0a</sup> Department of Mathematics, School of Computation, Information and Technology, Technical University of Munich, Boltzmannstraße 3, 85748 Garching b. München; E-mail: antonia.freibert@tum.de

<sup>0b</sup> Department of Physics, University of Hamburg, Luruper Chaussee 149, 22761 Hamburg, Germany

<sup>0c</sup> Institute for Methods and Instrumentation for Synchrotron Radiation Research, Helmholtz-Zentrum Berlin für Materialien und Energie GmbH, 12489 Berlin, Germany

<sup>0d</sup> Institut für Physik und Astronomie, Universität Potsdam, 14476 Potsdam, Germany
